# Supplementary material for: Analysis of genomic-length HBV sequences to determine genotype and subgenotype reference sequences
Source: PubMed Central journal article supplement (PMC7416611; doi:10.1099/jgv.0.001387), 2020-03-05

## Supplementary Material

# Analysis of full-length HBV sequences to determine genotype and subtype reference sequences: a data resource to support research and clinical practice

Anna L McNaughton, Peter A Revill, Margaret Littlejohn,  
Philippa C Matthews, M Azim Ansari

Supplementary figure 1; Cumulative number of (A) all HBV sequences and (B) whole genome HBV sequences in Genbank, 2000-2018. Data downloaded directly from Genbank in December 2019.

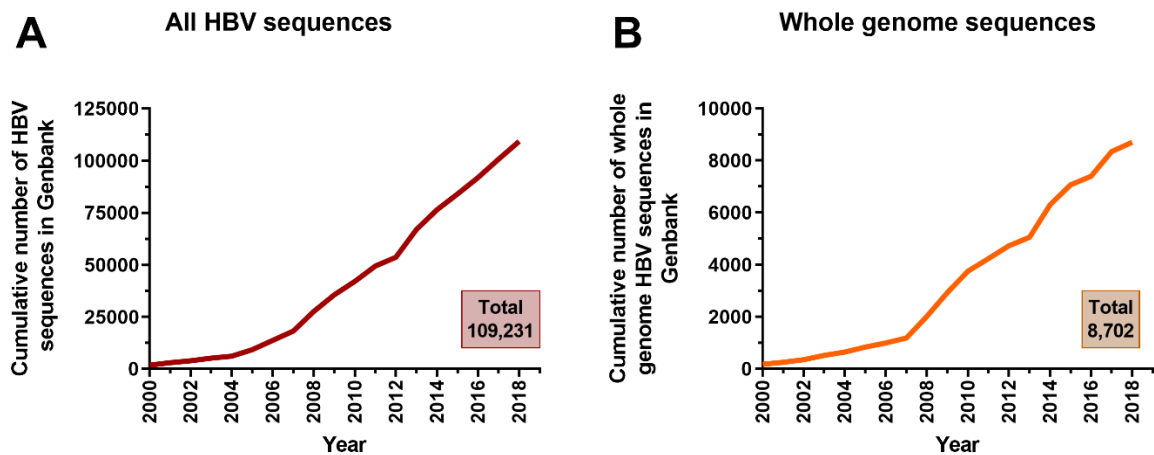

Supplement: jgv-101-271-s001.pdf [file jgv-101-271-s001.pdf]
